# Supplementary material
Source: publisher figshare collection journal article supplement (https://acs.figshare.com/ndownloader/files/3935773)
Supplement: Supplementary file 1 [file 3935773]

# Two Chain-Packing Transformations and their Effects on the Molecular Dynamics and Thermal Properties of $\alpha$ -Form Isotactic Poly(propylene) under Hot Drawing: A Solid-State NMR Study

Jia Kang and Toshikazu Miyoshi\*

Department of Polymer Science, The University of Akron, Akron, OH 44325-3909.

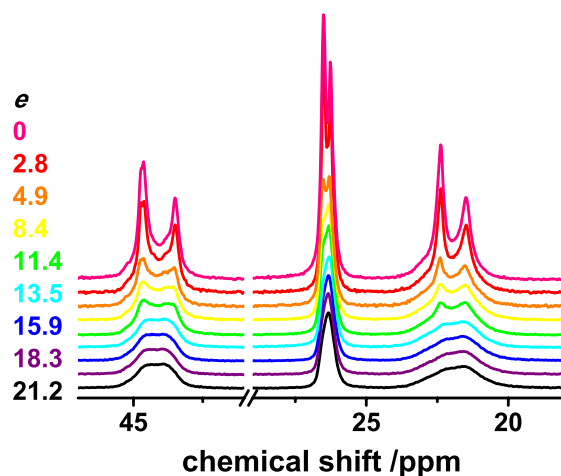

**Figure S1.** Pure crystalline  $^{13}\text{C}$  CPMAS spectra of the original  $\alpha_2$ -rich *i*PP drawn at  $T_d = 125^\circ\text{C}$  at various  $e$  values.

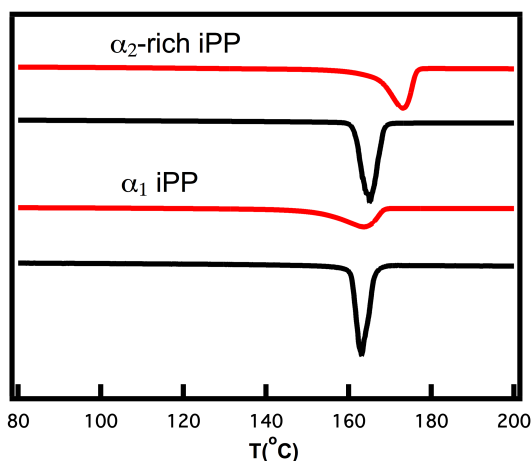

**Figure S2.** DSC curves of the original  $\alpha_2$ -rich *i*PP drawn at  $150^\circ\text{C}$  and the original  $\alpha_1$  *i*PP drawn at  $140^\circ\text{C}$ . The red curves represent the non-drawn samples and the black curves represent the samples drawn to  $e \approx 20$ .

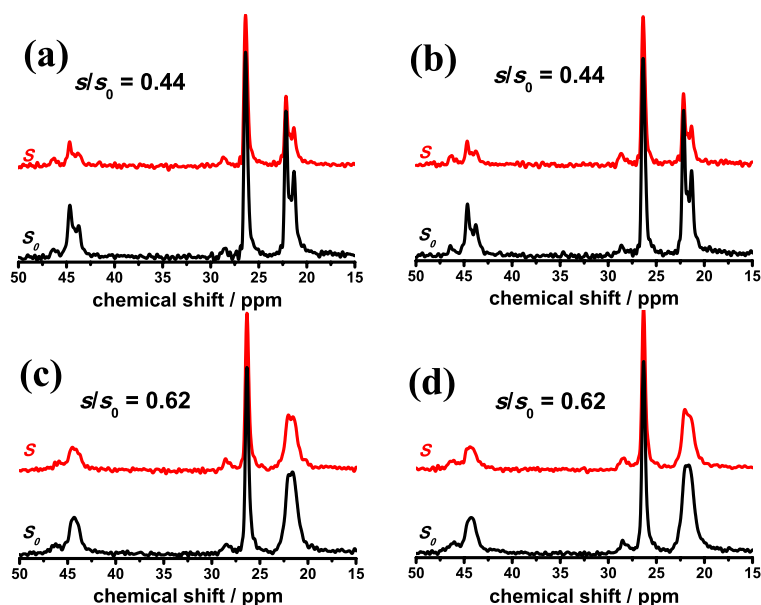

**Figure S3.** CODEX exchange ( $S$ ) and reference ( $S_0$ ) spectra for the undrawn original  $\alpha_2$ -rich sample (a) before and (b) after annealing at 120 °C for 30 hours with  $t_{\text{mix}} = 200$  ms, and the original  $\alpha_2$ -rich sample drawn to  $e = 20.4$  (c) before and (d) after annealing at 120 °C for 30 hours with  $t_{\text{mix}} = 20$  ms at 120 °C using  $^1\text{H}$ - $^{13}\text{C}$  double resonance 7mm probe. Annealing does not influence molecular dynamics for both the drawn and undrawn samples.
